# Supplementary material for: Natural history of the ossification of cervical posterior longitudinal ligament: a three dimensional analysis
Source: Springer Nature journal article supplement (doi:10.1007/s00264-017-3667-z), 2017-10-24
Supplement: MOESM1 [file 15158902]

## Sheet: 解析
name	ID	age	sex	Sex no	OPLL clasification	classification no.	Fa	BH	BW	BMI	DM	ROM(initial)	N (initial)	F (initial)	E (initial)	JOA (initial)	Seg.ROM(initial)	No. of vertebra	thickness	canal AP	occupation rate	SAC	volume (initial)	F/U	ROM (fin)	N (Fin)	F (Fin)	E (Fin)	seg ROM(Fin)	JOA (Fin)	volume (Fin)	annal rate of increase
No1	369-091-1	62	M	1	con	2	0	162	78	29.7211	1	15	10	0	15	16	1	3	8.1	12.1	66.9421	4	3654.09	36	13	10	2	15	1	16	4092.72	4
No2	315-571-4	68	F	0	mix	1	1	158.1	60.4	24.1642	0.5	31	4	-20	11	17	2	5	4	8.8	45.4545	4.8	2248.55	25	34	3	-21	13	1	17	2469.9	4.73
No3	368-881-0	65	F	0	seg	3	1	148.2	54.5	24.8142	0	33	9	-8	25	17	1	3	5.9	11.2	52.6786	5.3	483.06	24	29	9	-6	23	2	17	491.22	0.84
No4	014-201-8	62	M	1	con	2	1	154.2	51.8	21.7852	0.5	35	17	-5	30	16	5	3	2.4	12.6	19.0476	10.2	809.81	24	41	16	-9	32	3	16	828.32	1.14
No5	398-553-9	69	M	1	mix	1	0	156	60.5	24.8603	0.5	17	7	-10	7	16	4	4	4.1	12.3	33.3333	8.2	1130.69	24	27	12	-9	18	2	16	1203.9	3.24
No6	043-283-1	57	F	0	mix	1	0	159.5	55.7	21.8944	0	29	-1	-26	3	15	6	4	5.3	10.4	50.9615	5.1	1908.68	45	35	-5	-27	8	8	14	2171.57	3.67
No7	396-211-3	73	M	1	mix	1	0	180	73.5	22.6852	0.5	31	7	-15	16	17	8	6	3.7	10.1	36.6337	6.4	4967.98	24	29	6	-11	18	10	17	5087.29	1.2
No8	347-235-3	74	M	1	mix	1	0	160.6	56.1	21.7506	0	15	20	10	25	17	7	6	5.7	9.7	58.7629	4	2580.11	12	18	29	14	32	10	17	2667.31	3.38
No9	004-137-8	53	F	0	con	2	0	152.2	73.6	31.7723	1	24	18	0	24	17	0	2	4.9	13.2	37.1212	8.3	1749.72	39	26	12	1	27	0	17	1935.91	3.27
No10	336-988-9	68	M	1	seg	3	0	155	61.3	25.5151	0	53	26	-5	48	12	13	2	2.5	11.8	21.1864	9.3	151.845	84	23	39	18	41	5	12	174.15	4.9
No11	401-018-3	62	M	1	mix	1	0	159	63	24.9199	0.5	23	13	1	24	12	1	5	3.9	10.8	36.1111	6.9	1387.09	12	20	18	0	20	2	12	1461.49	5.36
No12	374-764-6	57	F	0	mix	1	1	159	62	24.5243	0	34	19	-8	26	15	8	2	3.6	12.3	29.2683	8.7	402.9	36	28	13	-3	25	9	15	430.67	2.3
No13	085-214-7	63	M	1	mix	1	0	167.8	73	25.9262	1	24	23	10	34	16	5	6	6.7	14.2	47.1831	7.5	2510.77	12	24	25	2	26	7	16	2512.88	0.08
No14	379-902-6	67	M	1	mix	1	0	156.6	63.5	25.8935	0	37	24	-7	30	13	4	6	6	12.3	48.7805	6.3	3273.22	36	28	16	-3	25	3	13	3707.84	4.43
No15	166-511-1	58	M	1	mix	1	0	161.8	53.1	20.2832	0	42	0	-21	21	17	8	5	5.3	11.1	47.7477	5.8	2653.84	12	35	1	-13	22	9	17	2690.66	1.39
No16	398-833-3	58	M	1	mix	1	0	175	72.3	23.6082	0	22	13	-1	21	11	5	5	5	12.7	39.3701	7.7	1751.41	17	14	16	21	35	6	10	1777.1	1.04
No17	288-304-0	57	F	0	mix	1	0	152	53	22.9398	0	34	10	-4	30	17	6	2	3.9	12.6	30.9524	8.7	1776.05	36	30	17	-7	23	6	17	2080.08	5.71
No18	348-824-1	58	F	0	mix	1	0	154	44	18.5529	0	42	18	-5	37	17	9	5	4.1	10.7	38.3178	6.6	431.6	18	35	15	-2	33	7	17	482.05	7.79
No19	402-903-8	60	F	0	seg	3	0	156.7	43.3	17.634	0	55	4	-20	35	17	8	1	2.5	11.2	22.3214	8.7	25.81	84	51	4	-27	24	7	15	35.24	5.22
No20	119-068-7	58	F	0	mix	1	0	162.7	56.9	21.495	1	45	12	-16	29	17	1	5	4	12.8	31.25	8.8	2208.59	12	42	9	-14	28	1	17	2265.15	2.56
No21	801-410-8	80	M	1	mix	1	0	157.8	67.3	27.0272	0	19	14	-10	9	14	2	4	6.9	11.7	58.9744	4.8	1901.31	12	21	7	-12	9	1	14	1960.41	3.11
No22	368-706-6	66	M	1	mix	1	0	174.7	67.6	22.1493	1	31	20	-3	28	11	3	3	3.3	11.4	28.9474	8.1	1053.4	26	31	22	-6	25	4	11	1114.71	2.69
No23	800-544-3	61	F	0	seg	3	0	150.2	47.3	20.9663	1	37	16	-15	22	14	2	2	3.5	8.6	40.6977	5.1	627.47	19	41	14	-15	26	5	14	650.13	2.28
No24	090-691-3	67	F	0	mix	1	0	145	50	23.7812	0	39	35	1	40	16	6	3	4.4	11.6	37.931	7.2	2372.66	13	37	30	0	37	5	16	2379.73	0.28
No25	425-463-5	70	F	0	mix	1	0	157.8	56.4	22.6498	1	41	20	-6	35	17	2	2	6.5	12	54.1667	5.5	1199.99	12	43	24	-8	35	1	17	1280.63	6.72
No26	086-585-1	35	F	0	mix	1	0	162.5	87	32.9467	1	49	7	-23	26	14	0	4	5	14.1	35.461	9.1	1397.5	24	37	-6	-11	26	1	14	1700.56	10.84
No27	409-169-8	67	M	1	mix	1	0	155.9	52.8	21.7241	0	30	16	-4	26	16	1	5	7.11	13.54	52.5111	6.43	5593.11	12	30	17	-5	25	0	16	5884.3	5.21
No28	409-863-3	71	F	0	mix	1	1	151	62	27.1918	0	23	9	-8	15	17	0	2	7.28	11.34	64.1975	4.06	2518.87	24	30	0	-17	13	1	17	2793.74	5.46
No29	411-320-9	53	M	1	mix	1	0	171	80	27.3588	0	13	1	-6	7	17	1	4	6.1	13.2	46.2121	7.1	4902.76	24	14	2	-11	3	0	17	5399.11	5.06
No30	3305473	66	F	0	mix	1	0	156	67	27.5312	0.5	33	17	-6	27	16	5	3	5.98	11.21	53.3452	5.23	848.48	24	26	15	-5	21	3	16	862.5	0.83
No31	3329763	55	M	1	seg	3	0	170	73	25.2595	0	40	11	-22	18	15	7	4	3.9	13.6	28.6765	9.7	1642.87	12	40	8	-26	14	6	15	1748.48	6.43
No32	3212769	53	F	0	mix	1	0	152.5	60.5	26.0145	0.5	47	15	-22	25	17	2	5	3.9	11.87	32.8559	7.97	1742.2	48	31	9	-17	14	2	17	2157.18	5.95
No33	2785129	79	F	0	mix	1	0	150	45	20	0	37	-1	-10	27	16	1	5	4.6	9.9	46.4646	5.3	2683.04	12	44	23	-15	29	1	16	2732.44	1.84
No34	3278760	44	M	1	mix	1	0	176	83	26.7949	1	36	7	-16	20	17	1	4	4.72	10.44	45.2107	5.72	1947.72	44	37	14	-16	21	1	17	2591.38	9.01
No35	667-114-4	61	M	1	mix	1	1	174.6	85.1	27.9152	1	28	-4	-19	9	16	12	3	8.64	12.07	71.5824	3.43	5703.48	12	16	-4	-13	3	12	15	5935.39	4.07
No36	8003955	59	M	1	mix	1	0	161	73.5	28.3554	0.5	31	8	-19	12	17	4	5	3.25	9.2	35.3261	5.95	1999.31	12	32	3	-20	12	6	17	2115.4	5.81
No37	4451945	68	M	1	mix	1	1	159	62.1	24.5639	0	29	3	-18	11	17	0	4	6.6	14.1	46.8085	7.5	1157.38	23	23	-6	-16	7	0	17	1195.41	1.71
No38	3242382	76	M	1	mix	1	0	172.1	77.1	26.0311	1	30	-11	-25	5	14	2	3	4.5	12.2	36.8852	7.7	959.8	12	28	-1	-23	5	2	15	1037.13	8.06
No39	2764202	57	男	1	mix	1	1	174	67	22.1297	1	32	16	-6	26	15	0	3	7.7	13.4	57.4627	5.7	4508.03	36	25	24	5	30	1	15	4874.31	2.71
No40	3340295	39	F	0	mix	1	0	167	80	28.6851	0	38	-2	-24	14	16	0	3	6.4	12.8	50	6.4	724.18	24	33	-2	-19	14	0	16	877.84	10.61
No41	2216574	59	F	0	mix	1	0	159	54	21.3599	0	30	8	-6	24	17	1	2	6	10.8	55.5556	4.8	2352.16	14	29	12	-9	20	2	17	2385.1	1.2
